# Supplementary material
Source: publisher figshare collection journal article supplement (https://acs.figshare.com/ndownloader/files/4296367)
Supplement: Supplementary file 1 [file 4296367]

# Oxygen-Isotope Exchange between CO<sub>2</sub> and Solid

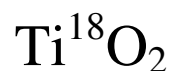

*Svatopluk Civiš<sup>a,\*</sup>, Martin Ferus<sup>a,b</sup>, Pavel Kubát, Markéta Zúkalová<sup>a</sup> and Ladislav Kavan<sup>a</sup>*

<sup>a</sup> *J. Heyrovský Institute of Physical Chemistry, Academy of Sciences of the Czech Republic, Dolejškova 3, 182 23 Prague 8, Czech Republic*

<sup>b</sup> *Institute of Physics, Czech Academy of Sciences, Na Slovance 2, 182 21 Prague 8, Czech Republic*

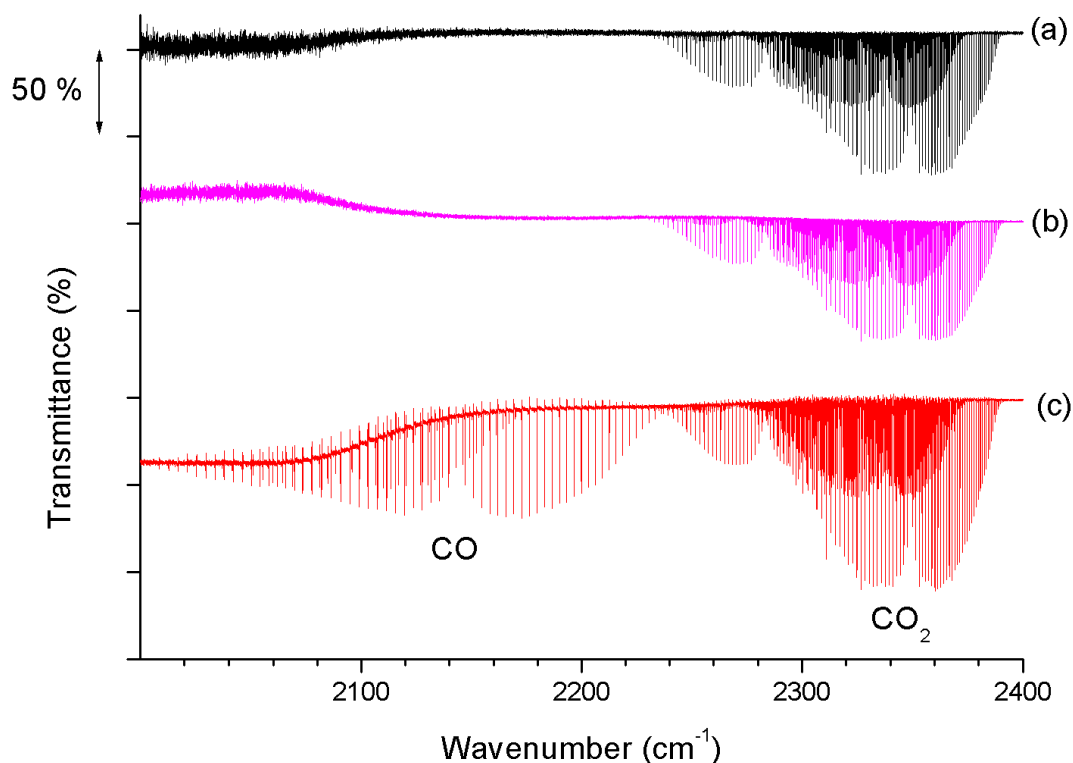

**Figure S1.** Comparison of the FTIR spectrum of the gas phase in the mixture of solid Ti<sup>18</sup>O<sub>2</sub> (sample A200) and CO<sub>2</sub> before irradiation (a), after 120 min irradiation by 160 W UV lamp (340 nm, b), and after the irradiation with 4500 pulses of the XeCl laser (308 nm, pulse width 28 ns, energy 180 mJ) (c). Spectra are offset.

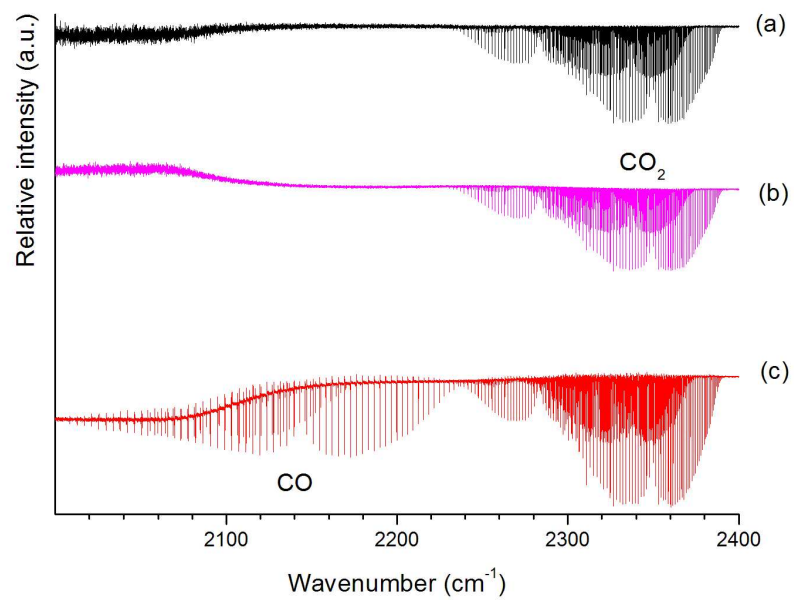

288x200mm (150 x 150 DPI)
